# Supplementary material
Source: Springer Nature journal article supplement (https://www.springermedizin.de/resource/supplementary/12890_2011_296_MOESM2_ESM.pdf/9504872)

N per arm

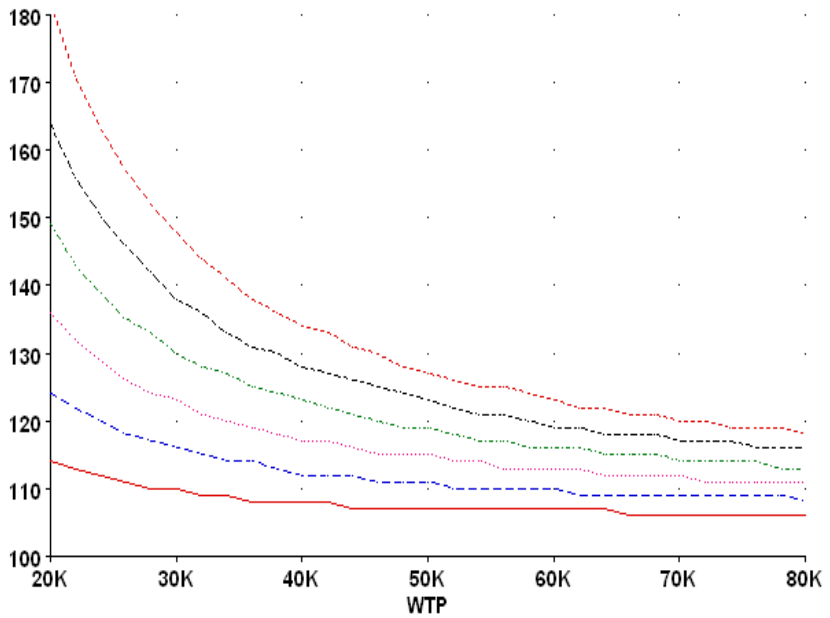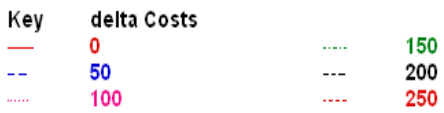

Supplement: MOESM2 [file 9504872]
